# Supplementary material
Source: Springer Nature journal article supplement (https://www.springermedizin.de/resource/supplementary/13002_2011_246_MOESM3_ESM.pdf/9627486)

**a) Cajamarca**

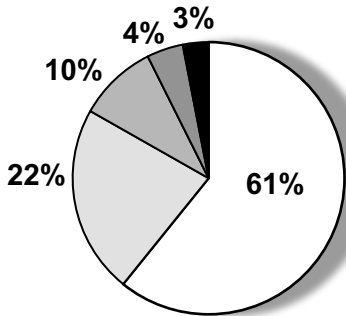

**b) Huánuco**

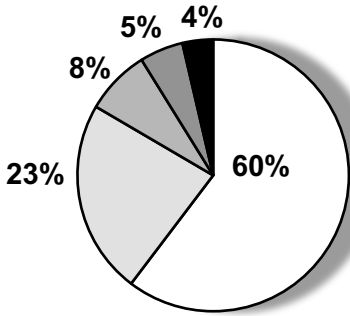

Supplement: MOESM3 [file 9627486]
